# Supplementary material for: Clinical characteristics, management, and outcomes of pulmonary valve myxoma: systematic review of published case reports
Source: World J Surg Oncol. 2023 Mar 20;21:99. doi: 10.1186/s12957-023-02984-0 (PMC10026419; doi:10.1186/s12957-023-02984-0)
Supplement: Supplementary file 1 — Additional file 1. Bias risk assessment of included studies using Joanna Briggs Institut checklist. [file 12957_2023_2984_MOESM1_ESM.xlsx]

## Sheet: Bias risk assesment
			Bias risk assessment of included studies using Joanna Briggs Institut checklist
No.	Author, year	Study	Q1	Q2	Q3	Q4	Q5	Q6	Q7	Q8
1	Tansel et al 2011	case report	yes	no	yes	yes	yes	yes	not applicable	no
2	Yamaguchi A et al, 2022	case report	yes	yes	yes	yes	yes	yes	yes	yes
3	Kumagai K et al, 2008	case report	yes	yes	yes	yes	yes	yes	yes	yes
4	Catton et al 1963	case report	yes	Yes	yes	yes	yes	yes	yes	yes
5	Tanabe et al 2022	case report	yes	Yes	yes	yes	yes	yes	yes	yes
6	Yang et al 2010	case report	yes	no	yes	yes	yes	yes	unclear	yes
7	Sargar et al 2014	case report	yes	Yes	yes	yes	yes	yes	yes	yes
8	Mai et al, 2012	case report	yes	yes	yes	yes	yes	no	yes	yes
9	Roux et al, 2017	case report	yes	yes	yes	yes	unclear	no	no	yes
		*checklist available at https://jbi.global/sites/default/files/2019-05/JBI_Critical_Appraisal-Checklist_for_Case_Reports2017_0.pdf
